# Supplementary material for: Synthesis and characterization of magnetic elongated hollow mesoporous silica nanocapsules with silver nanoparticles
Source: Royal Society of Chemistry journal article supplement (doi:10.1039/c5ta09353h), 2016-01-01
Supplement: c5ta09353h1.pdf [file c5ta09353h1.pdf]

## Supporting Information

### **Synthesis and characterization of magnetic elongated hollow mesoporous silica nanocapsules with silver nanoparticles**

Guijia Cui, Zebin Sun, Haizhen Li, Xiaoning Liu, Yan Liu, Yaxi Tian, Shiqiang Yan\*

*College of Chemistry and Chemical Engineering, Lanzhou University, Lanzhou  
730000, P. R. China*

---

\* Corresponding author. Tel.: +86 931 8912582; Fax: +86 931 8912582

E-mail address: yansq@lzu.edu.cn

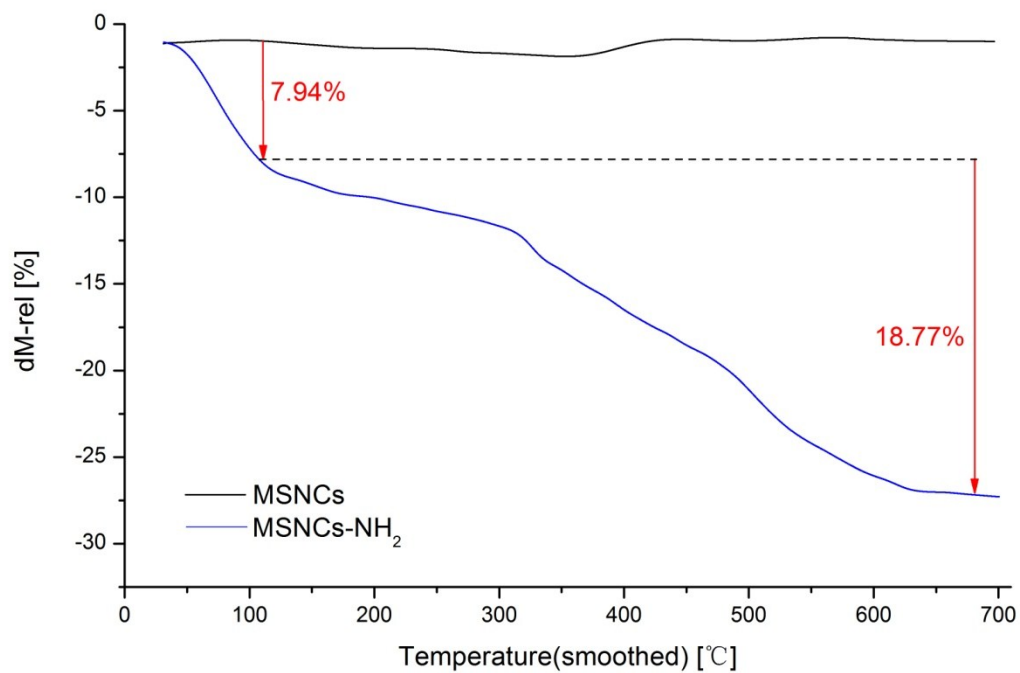

**Figure S1.** TGA curves of MSNCs and MSNCs-NH<sub>2</sub>.

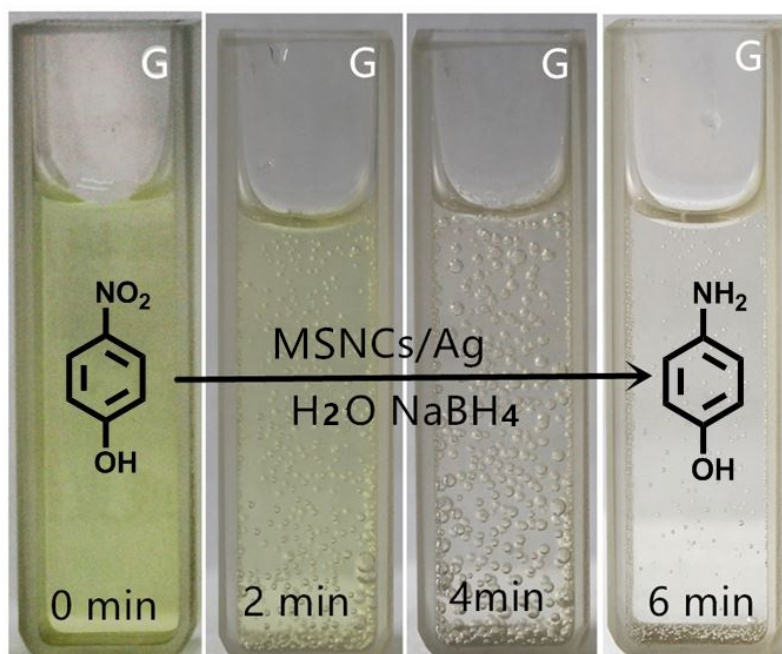

**Figure S2.** The color changes of the solution in the cuvette at different times

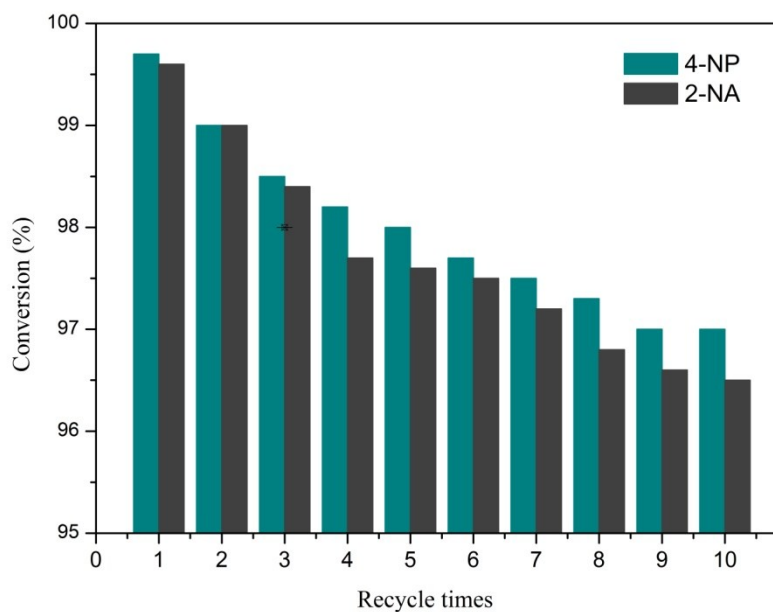

**Figure S3.** The reusability of MSNCs/Ag catalyst for the reduction of 4-NP and 2-NA with NaBH<sub>4</sub>.

**Table S1.** Inductively coupled plasma (ICP) analysis of the content of Ag, surface areas and pore volume of MSNCs and MSNCs/Ag

| Samples  | Content of Ag (%) | Surface area (m <sup>2</sup> /g) | Pore volume (cm <sup>3</sup> /g) | Pore width(nm) |
|----------|-------------------|----------------------------------|----------------------------------|----------------|
| MSNCs    |                   | 850                              | 1.60                             | 8              |
| MSNCs/Ag | 15.43             | 336                              | 0.67                             | 7              |

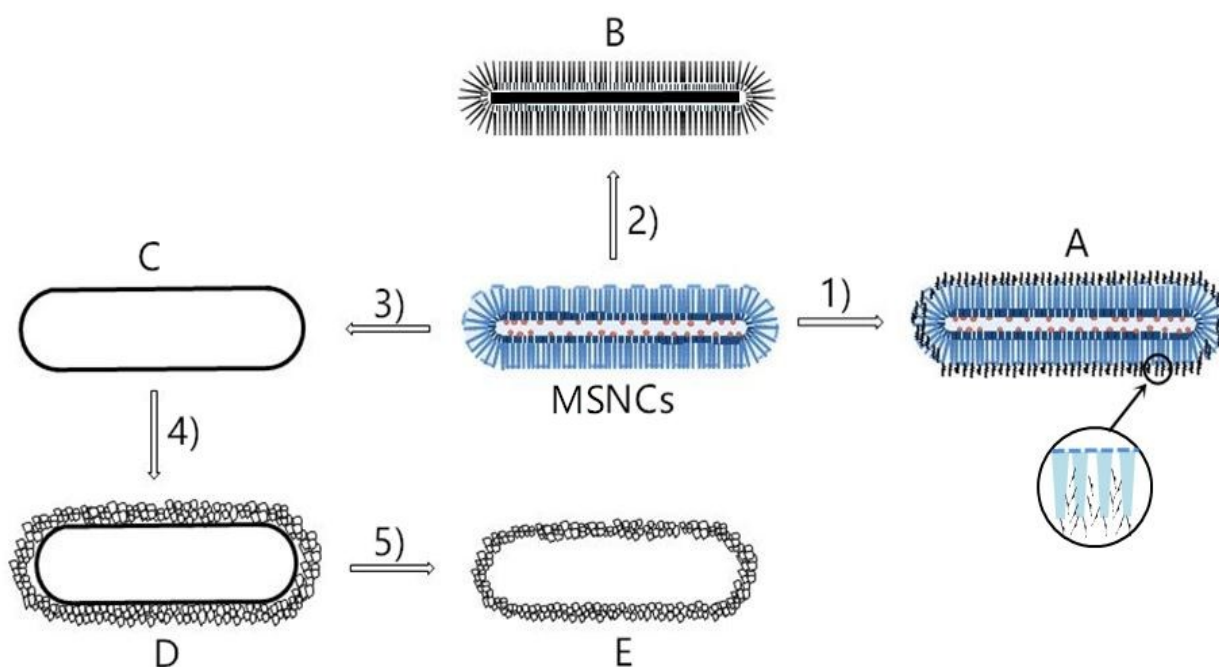

**Scheme S1.** Illustration of the procedures used to synthesize a variety of materials derived from the MSNCs nanocapsules: (A) functionalized MSNCs capsules, (B) urchin-like nanoparticles with outward spines, (C) porous carbon capsules, (D) carbon capsules coated with an inorganic phase, (E) inorganic capsules. The basic synthesis procedures used were: (1) incorporation of functional groups, (2) nanocasting and silica etching, (3) carbonization and silica etching, (4) coating the carbon capsule with an inorganic phase (e. g. metallic oxides) and (5) calcination.
